# Supplementary material
Source: Springer Nature journal article supplement (https://www.springermedizin.de/resource/supplementary/13002_2009_181_MOESM3_ESM.pdf/9627400)

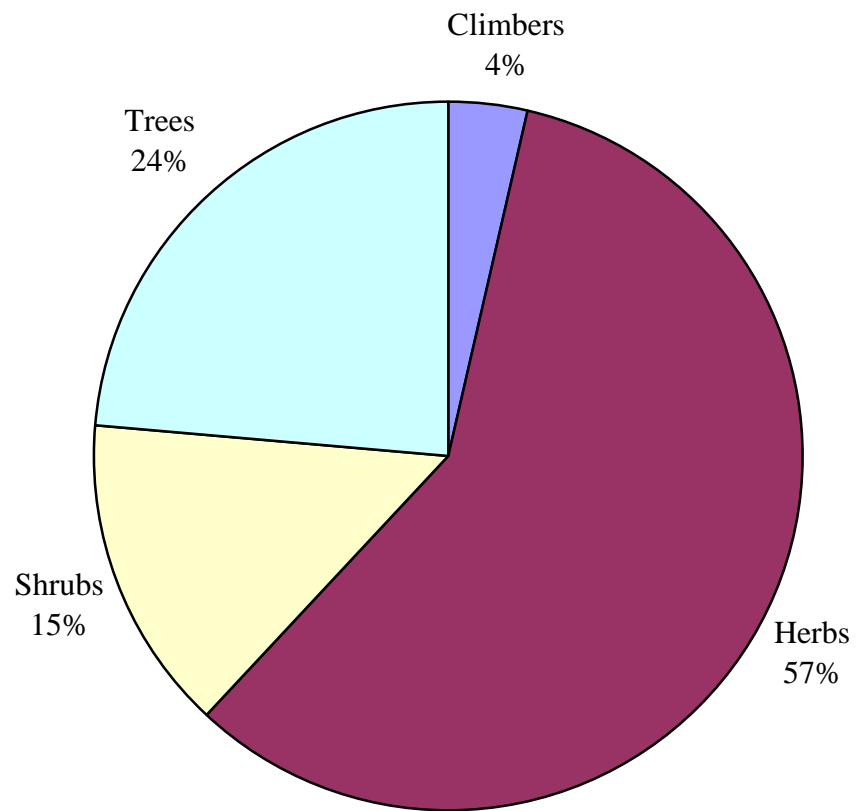

Figure 2 Distribution of plant forms used as medicinal plants

Supplement: MOESM3 [file 9627400]
